# Supplementary material for: Antibodies to the conserved region of the M protein and a streptococcal superantigen cooperatively resolve toxic shock-like syndrome in HLA-humanized mice
Source: PubMed Central journal article supplement — Sci Adv. 2019 Sep 4;5(9):eaax3013. doi: 10.1126/sciadv.aax3013 (PMC6726444; doi:10.1126/sciadv.aax3013), 2019-09-04
Supplement: aax3013_SM.pdf [file aax3013_SM.pdf]

## Supplementary Materials for

### **Antibodies to the conserved region of the M protein and a streptococcal superantigen cooperatively resolve toxic shock-like syndrome in HLA-humanized mice**

Manisha Pandey\*, Ainslie Calcutt, Victoria Ozberk, Zhenjun Chen, Matthew Croxen, Jessica Powell, Emma Langshaw, Jamie-Lee Mills, Freda E.-C. Jen, James McCluskey, Jenny Robson, Gregory J. Tyrrell, Michael F. Good\*

\*Corresponding author. Email: michael.good@griffith.edu.au (M.F.G.); m.pandey@griffith.edu.au (M.P.)

Published 4 September 2019, *Sci. Adv.* **5**, eaax3013 (2019)  
DOI: 10.1126/sciadv.aax3013

#### **This PDF file includes:**

- Fig. S1. SAg profile of streptococcal isolates.
- Fig. S2. Cytokine response of PBMCs following stimulation with vaccinated and control sera.
- Fig. S3. Cytokine profile in HLA-B6 mice after stimulation with rM1.
- Fig. S4. Immunological cross-reactivity between J14 and J14.1.
- Table S1. Clinical isolates and medical history of patients.
- Table S2. Primers used for SAg gene profiling.
- Table S3. Distribution of *spec* and *spea* genes in ISD isolates from Canada.
- Reference (46)

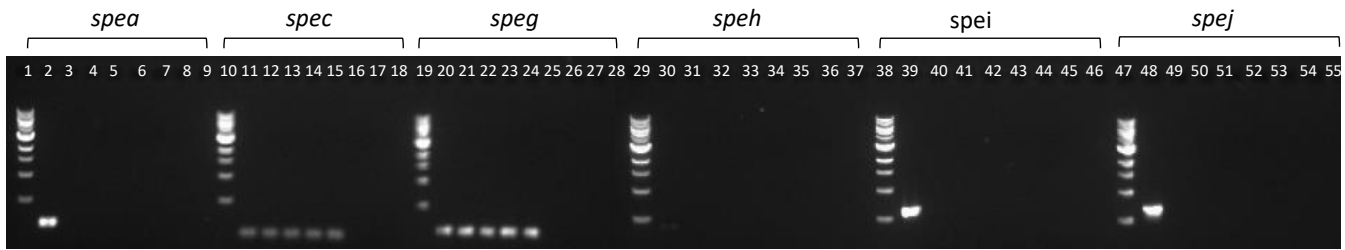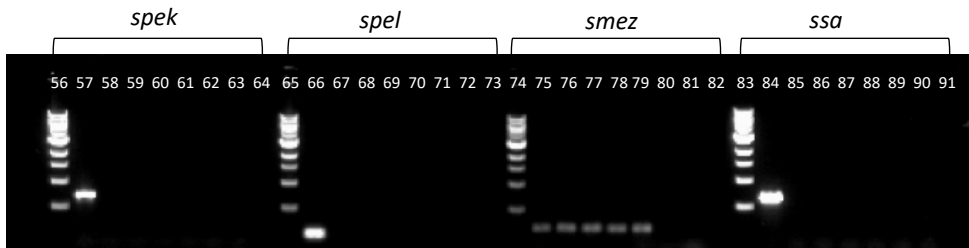

| <i>Spea</i>         | <i>spec</i>          | <i>speg</i>          | <i>speh</i>          | <i>Spei</i>          | <i>spej</i>          | <i>spek</i>          | <i>spel</i>          | <i>smez</i>          | <i>ssa</i>           |
|---------------------|----------------------|----------------------|----------------------|----------------------|----------------------|----------------------|----------------------|----------------------|----------------------|
| 1. 1 kb ladder      | 10. 1 kb ladder      | 19. 1 kb ladder      | 29. 1 kb ladder      | 38. 1 kb ladder      | 47. 1 kb ladder      | 56. 1 kb ladder      | 65. 1 kb ladder      | 74. 1 kb ladder      | 83. 1 kb ladder      |
| 2. Pos. control     | 11. Pos. control     | 20. Pos. control     | 30. Pos. control     | 39. Pos. control     | 48. Pos. control     | 57. Pos. control     | 66. Pos. control     | 75. Pos. control     | 84. Pos. control     |
| 3. SN1              | 12. SN1              | 21. SN1              | 31. SN1              | 40. SN1              | 49. SN1              | 58. SN1              | 67. SN1              | 76. SN1              | 85. SN1              |
| 4. SN2              | 13. SN2              | 22. SN2              | 32. SN2              | 41. SN2              | 50. SN2              | 59. SN2              | 68. SN2              | 77. SN2              | 86. SN2              |
| 5. SN3              | 14. SN3              | 23. SN3              | 33. SN3              | 42. SN3              | 51. SN3              | 60. SN3              | 69. SN3              | 78. SN3              | 87. SN3              |
| 6. SN4              | 15. SN4              | 24. SN4              | 34. SN4              | 43. SN4              | 52. SN4              | 61. SN4              | 70. SN4              | 79. SN4              | 88. SN4              |
| 7. NS33             | 16. NS33             | 25. NS33             | 35. NS33             | 44. NS33             | 53. NS33             | 62. NS33             | 71. NS33             | 80. NS33             | 89. NS33             |
| 8. H <sub>2</sub> O | 17. H <sub>2</sub> O | 26. H <sub>2</sub> O | 36. H <sub>2</sub> O | 45. H <sub>2</sub> O | 54. H <sub>2</sub> O | 63. H <sub>2</sub> O | 72. H <sub>2</sub> O | 81. H <sub>2</sub> O | 90. H <sub>2</sub> O |

**Fig. S1. SA profile of streptococcal isolates.** The genomic DNA (gDNA) was extracted from overnight stationary phase cultures using the GenElute bacterial gDNA extraction kit from Sigma. The gDNA was qualified using the Nanodrop1000 and then 2 µg of gDNA used for amplification of the superantigens. Gels were then run as per the image legend. NS33 is a group C streptococcal isolate that was used as a ‘superantigen negative’ control.

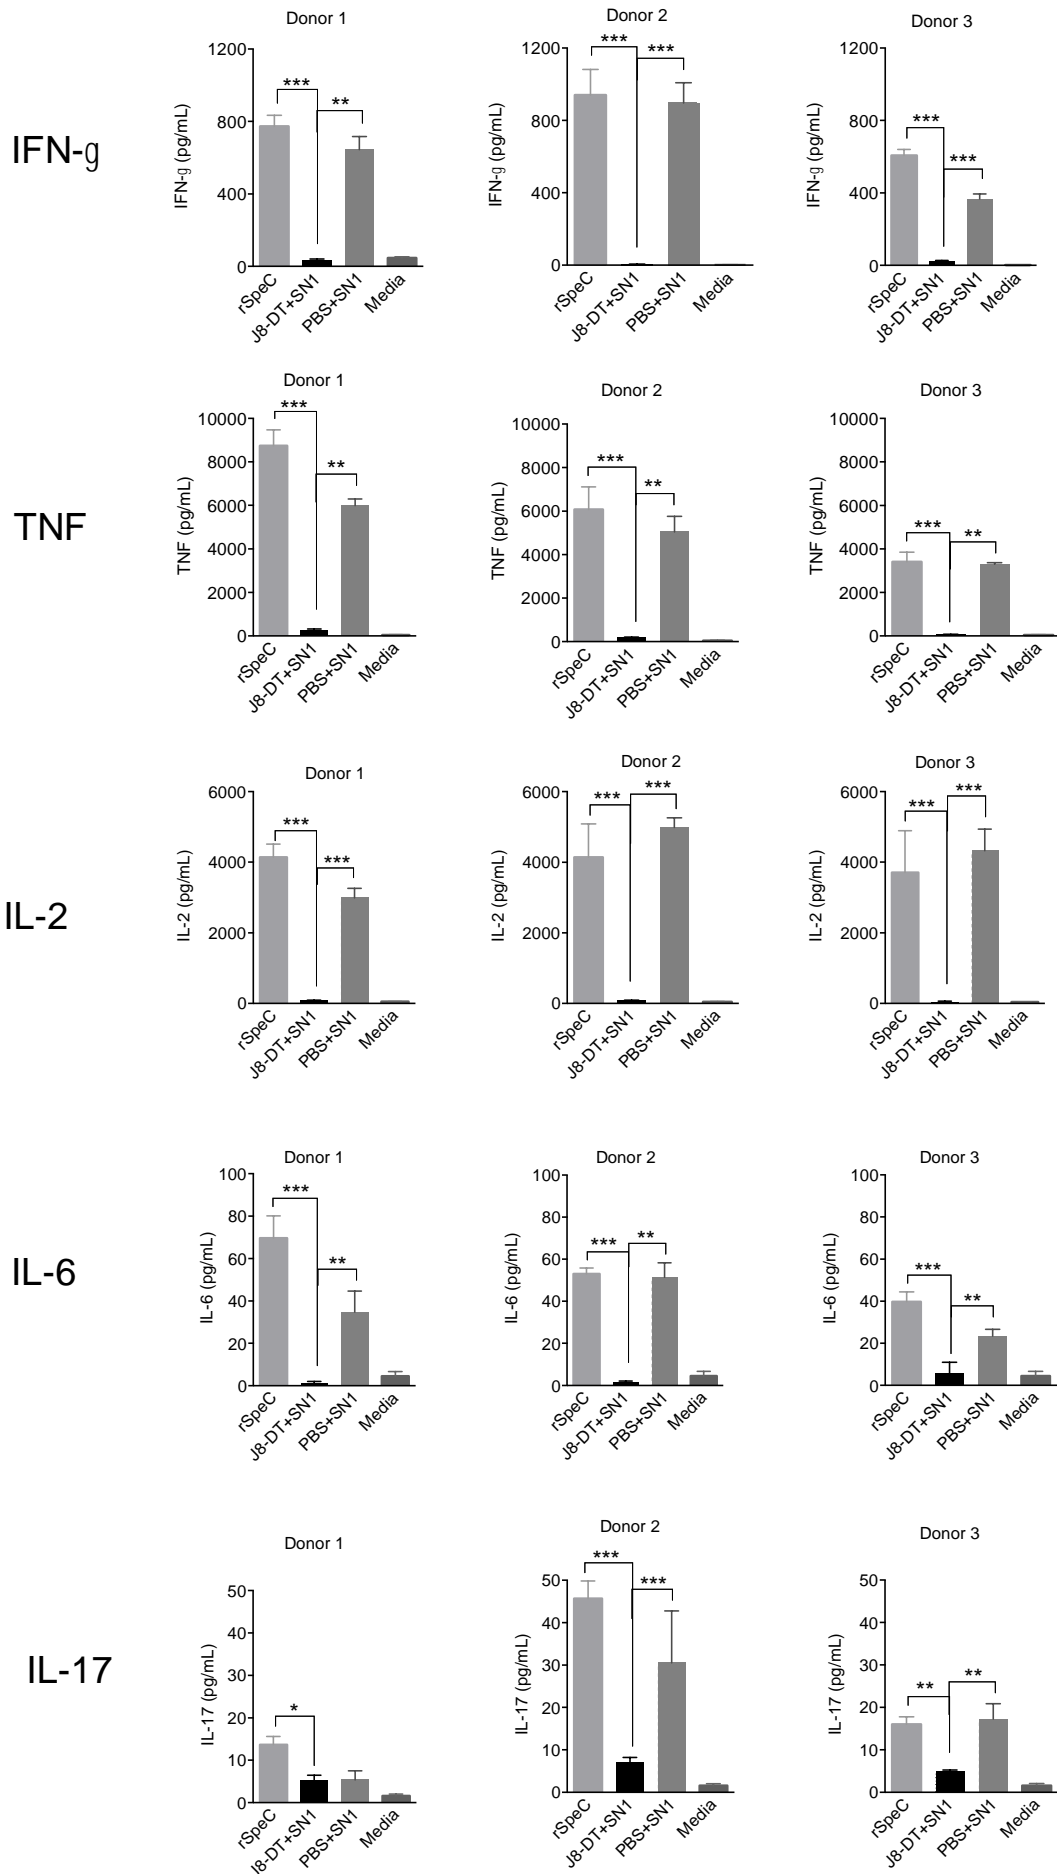

**Fig. S2. Cytokine response of PBMCs following stimulation with vaccinated and control sera.** PBMC from three different individuals were stimulated with 20  $\mu$ L of serum from vaccinated-SN1 infected or control-SN1 infected mice. Optimal concentrations of rSpeC and PHA were used as a positive control for stimulation. The inhibitory effect of rSpeC antisera was assessed by adding a pre-optimized amount (20  $\mu$ L) of rSpeC antisera to selected wells containing vaccinated-SN1 infected or control-SN1 infected sera or rSpeC. Media alone wells were used as negative controls. Cytokine responses were measured in the culture supernatants using CBA kit after 72 h of *in vitro* culture. Data are Mean $\pm$  SEM of 3 replicates in each experiment with experiments repeated twice. Statistical analysis was performed using non-parametric, unpaired Mann-Whitney U-test to compare the two groups. \* $p$ <0.05, \*\* $p$ <0.01 and \*\*\* $p$ <0.001.

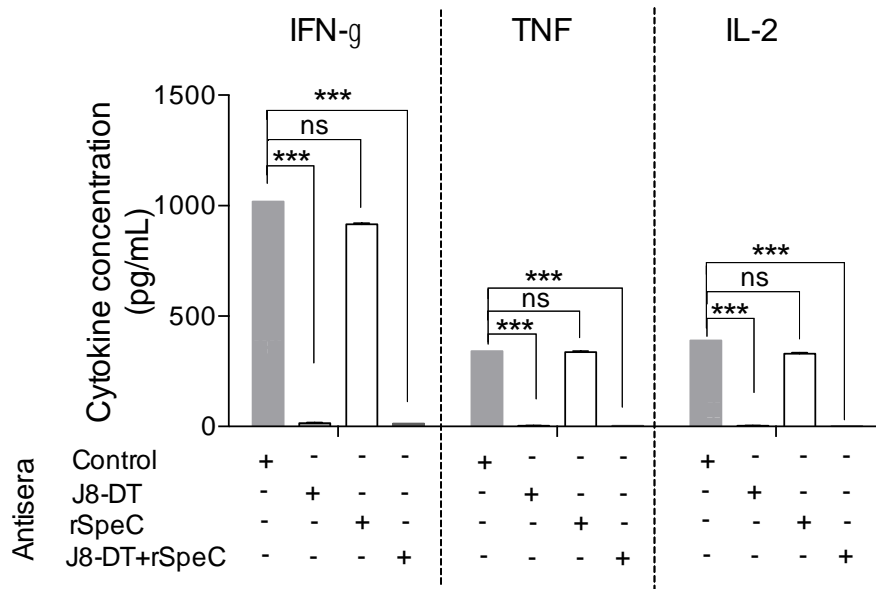

**Fig. S3. Cytokine profile in HLA-B6 mice after stimulation with rM1.** Splenocytes from HLA-B6 mice were stimulated with a pre-optimised concentration (5  $\mu\text{g/mL}$ ) of rM1. To assess inhibition of rM1 by antibodies to various antigens, 20  $\mu\text{L}$  of J8-DT, rSpeC or J8-DT+rSpeC antisera were added to each well. Non-immune sera from PBS treated mice was used as control. The culture supernatants were collected at 72 h post stimulation and cytokine induction by splenocytes in the presence or absence of various antisera assessed using a CBA kit. Concentrations of IFN- $\gamma$ , TNF and IL-2 in the presence or absence of various antisera are shown. One-way ANOVA with Tukey's post-hoc method was utilised to calculate significance between various groups. \*\*\* $p < 0.001$  and ns  $p > 0.05$ .

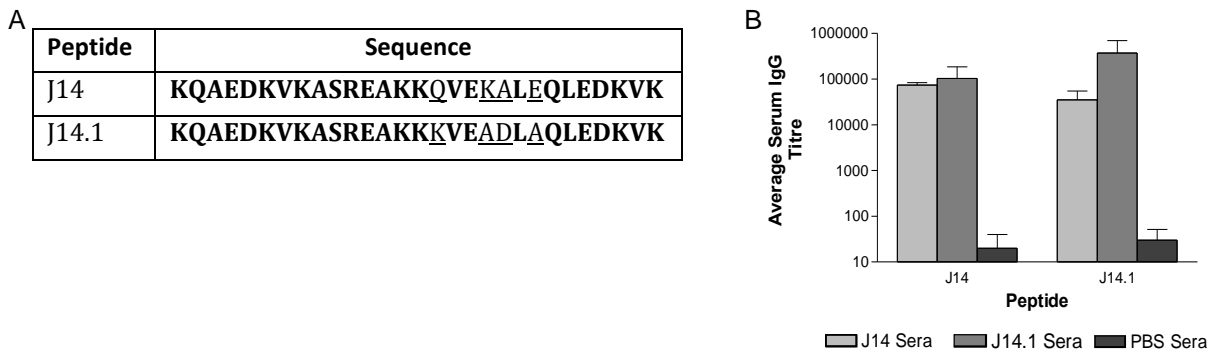

**Fig. S4. Immunological cross-reactivity between J14 and J14.1.** To assess immunological cross-reactivity between J8 and J8.1, we tested cross-reactivity between two slightly longer peptides, J14 and J14.1, which contain the J8 and J8.1 sequence, respectively. J14 and J14.1 ELISA assays were performed. **(A)** The peptide sequences are shown in the table. The sequence identity between the peptides is shown in bold and the underlined residues highlight the differences. **(B)** 96 well plates were coated with J14 or J14.1 peptide at 5  $\mu\text{g}/\text{mL}$  concentration. J14 and J14.1 antisera raised in B10.BR mice were tested against both peptides. As a control, PBS serum was also included. Antigen specific titers are shown.

**Table S1. Clinical isolates and medical history of patients.**

| <b>Laboratory Identifier</b> | <b>Group A Streptococcus culture</b> | <b>Location</b>       | <b>Year</b> | <b>Genotype</b>                             | <b>Clinical history</b>                                                                                                                                                              |
|------------------------------|--------------------------------------|-----------------------|-------------|---------------------------------------------|--------------------------------------------------------------------------------------------------------------------------------------------------------------------------------------|
| SN1                          | Blood                                | Queensland, Australia | 2013        | <i>emm89; speb</i> and <i>spec</i> positive | 91-year old male long stay inpatient of rehabilitation unit; new onset fever, septic shock. Deceased                                                                                 |
| SN2                          | Blood                                | Queensland, Australia | 2013        | <i>emm89; speb</i> and <i>spec</i> positive | 95-year old male in same unit developed acute sepsis with hypotension, septic shock. Deceased                                                                                        |
| SN3                          | Blood and Skin                       | Queensland, Australia | 2013        | <i>emm89; speb</i> and <i>spec</i> positive | 87-year old female - necrotising fasciitis associated with fever and hypotension; Surgical debridement. Survived                                                                     |
| SN4                          | Skin                                 | Queensland, Australia | 2014        | <i>emm89; speb</i> and <i>spec</i> positive | 68-year old male undergoing rehabilitation following brain tumour resection. 2 months after the first 3 cases developed fever, rash, pharyngitis and blistering cellulitis. Survived |

**Table S2. Primers used for SAg gene profiling.**

| <b>Gene</b> | <b>Forward primer (5'to 3')</b> | <b>Reverse primer (5'to 3')</b> | <b>Annealing temp (°C)</b> | <b>Reference</b> |
|-------------|---------------------------------|---------------------------------|----------------------------|------------------|
| <i>spea</i> | TGATAGGCTTTGGATACCATCG          | GAACCAAGAGATGGCAACTTTATT        | 60                         | [26]             |
| <i>spec</i> | GATTTCTACTATTTACC               | AAATATCTGATCTAGTCCC             | 62                         | [46]             |
| <i>speg</i> | ACCCCATGCGATTATGAAAA            | GGGAGACCAAAAACATCGAC            | 60                         | [26]             |
| <i>speh</i> | TTGGATCCAATTCTTATAATAACAACC     | CCACTTCCTGAGCGGTTACTTTTCGG      | 60                         | [26]             |
| <i>spei</i> | ATGAGTAGTGTGGGAGTTATTAA         | ATGAAGTTGATCAGAATAAGCG          | 55                         | [46]             |
| <i>spej</i> | ATCTTATTTAGTCCAAAGGTAAAT        | GTGAACGAGGAGAGGTATGAA           | 55                         | [46]             |
| <i>spek</i> | GCGGATCCGATACGTACAATACAAATG     | GCGAATTCAATAGCATTCAACCA         | 55                         | [46]             |
| <i>spel</i> | ATAAGTCAGCACCTTCCTCTTTC         | AAATCTCCCGTTACCTTCCA            | 60                         | [26]             |
| <i>smez</i> | TTTCTCGTCCTGTGATTGGA            | AATGGGACGGAGAACATAGC            | 60                         | [26]             |
| <i>ssa</i>  | AGTCAGCCTGACCCTACTCCA           | TAAGGTGAACCTCTATAGCTATAG        | 59.1                       | [46]             |



**Table S3. Distribution of *spec* and *spea* genes in ISD isolates from Canada.**

| <b>2017-2018 collection for whole genome sequencing</b> |                           |                             |                             |
|---------------------------------------------------------|---------------------------|-----------------------------|-----------------------------|
| <b><i>emm</i> type</b>                                  | <b>Number of isolates</b> | <b><i>spec</i> positive</b> | <b><i>spea</i> positive</b> |
| <i>emm1</i>                                             | 11                        | 1                           | 11                          |
| <i>emm101</i>                                           | 9                         | 4                           | 0                           |
| <i>emm11</i>                                            | 8                         | 4                           | 0                           |
| <i>emm4</i>                                             | 7                         | 5                           | 0                           |
| <i>emm41</i>                                            | 7                         | 4                           | 0                           |
| <i>emm59</i>                                            | 8                         | 0                           | 0                           |
| <i>emm76</i>                                            | 8                         | 0                           | 0                           |
| <i>emm81</i>                                            | 8                         | 0                           | 0                           |
| <i>emm82</i>                                            | 5                         | 0                           | 0                           |
| <i>emm87</i>                                            | 1                         | 1                           | 0                           |
| <i>emm89</i>                                            | 5                         | 5                           | 0                           |
| <b>Percent positive</b>                                 | 77                        | <b>24/77 = 31.17%</b>       | <b>11/77 = 14.29%</b>       |
